# Supplementary material for: Comparison of the types of candidate reference samples for quality control of human epidermal growth factor receptor 2 status detection
Source: Springer Nature journal article supplement (doi:10.1186/s13000-016-0537-8), 2016-09-09

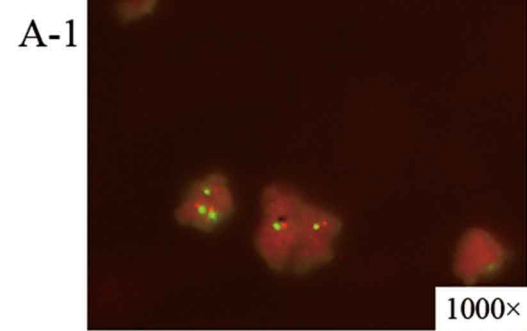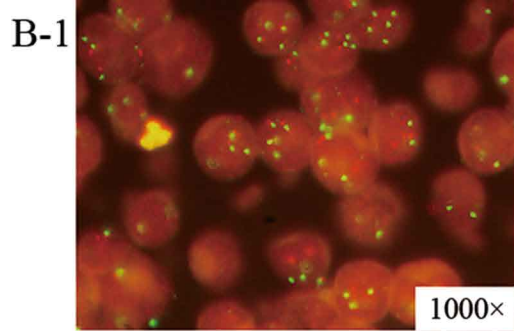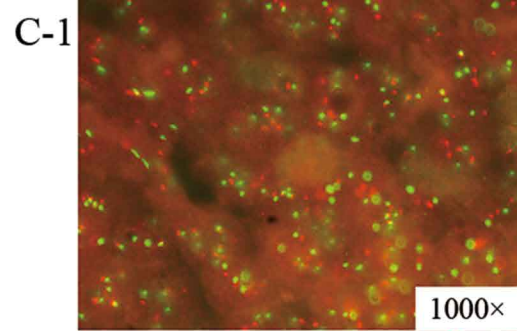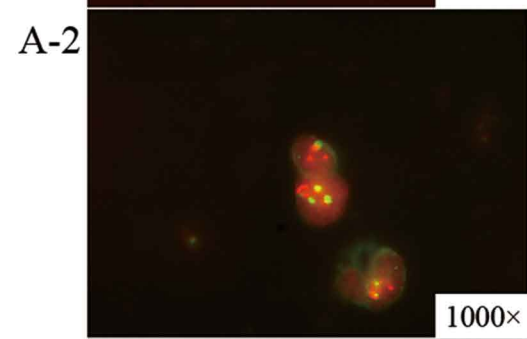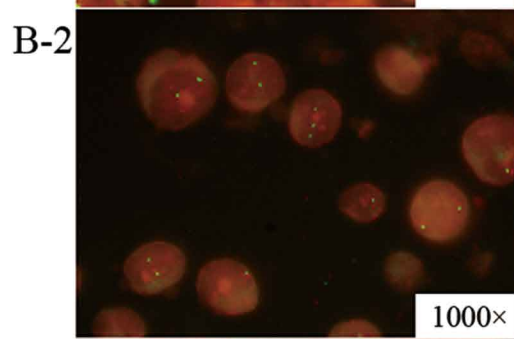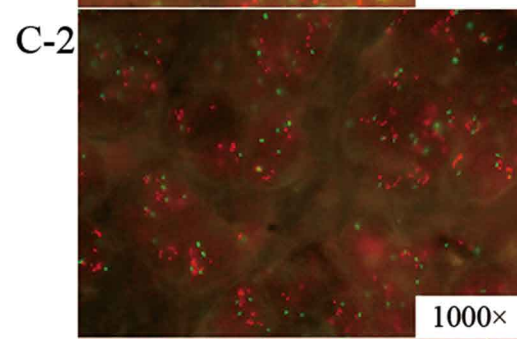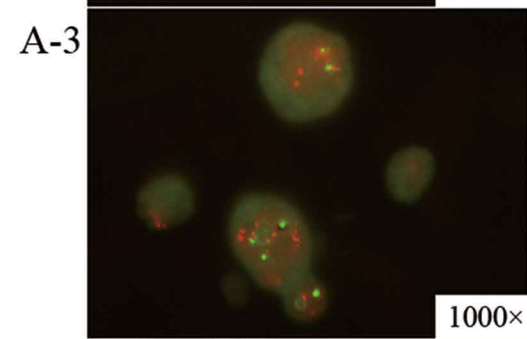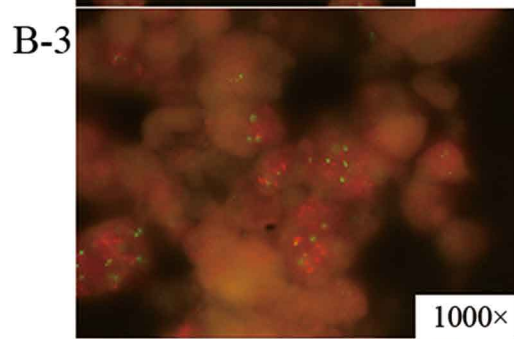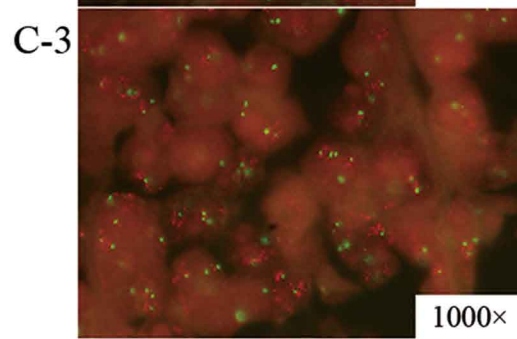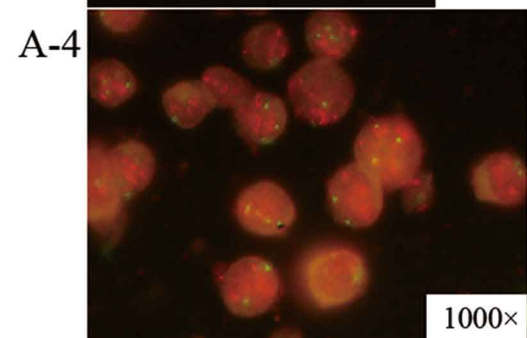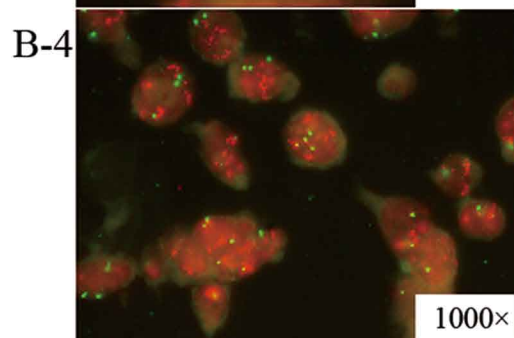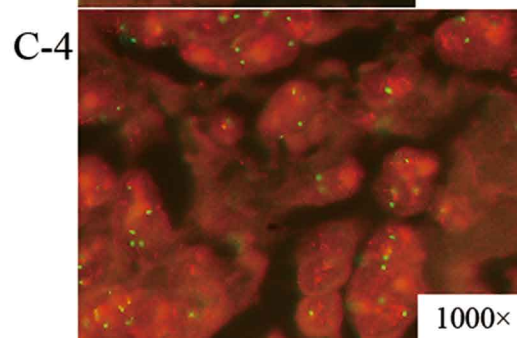

Supplement: MOESM1 [file 10687896]
